# Supplementary material
Source: PubMed Central journal article supplement (PMC4171834)
Supplement: NIHMS623839-supplement-Supplemental_Materials.pdf [file NIHMS623839-supplement-Supplemental_Materials.pdf]

Supplementary Table 1. Properties of SNPs tested in this study

| SNP        | position | Genic position | Allele1 | Allele2 |
|------------|----------|----------------|---------|---------|
| rs884709   | 15226882 | downstream     | A       | G       |
| rs1945602  | 15229753 | downstream     | A       | C       |
| rs10766220 | 15230305 | downstream     | A       | C       |
| rs1945607  | 15235997 | downstream     | A       | C       |
| rs10766222 | 15236239 | downstream     | C       | T       |
| rs1945608  | 15239174 | downstream     | T       | C       |
| rs12273915 | 15244475 | downstream     | A       | C       |
| rs4291658  | 15250777 | downstream     | G       | T       |
| rs4291659  | 15250944 | downstream     | C       | A       |
| rs7940545  | 15252744 | downstream     | T       | G       |
| rs9651633  | 15256503 | downstream     | C       | A       |
| rs7928484  | 15256698 | downstream     | G       | A       |
| rs11826924 | 15258338 | downstream     | T       | C       |
| rs10430887 | 15274464 | downstream     | A       | T       |
| rs1343841  | 15275804 | downstream     | C       | T       |
| rs10832395 | 15276280 | downstream     | C       | T       |
| rs1320211  | 15279532 | downstream     | A       | G       |
| rs4145786  | 15280531 | downstream     | T       | C       |
| rs10766229 | 15282052 | downstream     | A       | C       |
| rs16931357 | 15285714 | downstream     | A       | G       |
| rs11023518 | 15286691 | downstream     | C       | T       |
| rs4313573  | 15287174 | downstream     | G       | A       |
| rs4378368  | 15289848 | downstream     | C       | T       |
| rs2350987  | 15290007 | downstream     | A       | G       |
| rs10832402 | 15290612 | downstream     | C       | T       |
| rs4614430  | 15293603 | downstream     | C       | G       |
| rs4506629  | 15294796 | downstream     | A       | C       |
| rs4334003  | 15302149 | downstream     | T       | G       |
| rs7122103  | 15303398 | downstream     | C       | A       |
| rs4756805  | 15305088 | downstream     | C       | T       |
| rs7117265  | 15307181 | downstream     | A       | G       |
| rs11605083 | 15311822 | downstream     | C       | T       |
| rs10832406 | 15320598 | downstream     | C       | G       |
| rs4237705  | 15329370 | downstream     | T       | C       |
| rs11023543 | 15332445 | downstream     | A       | T       |
| rs10766237 | 15332521 | downstream     | T       | C       |
| rs10832409 | 15334275 | downstream     | T       | C       |
| rs11023546 | 15334894 | downstream     | T       | C       |
| rs4622244  | 15345285 | downstream     | T       | C       |
| rs4757309  | 15346657 | downstream     | T       | C       |
| rs4757312  | 15349496 | downstream     | A       | G       |
| rs7932410  | 15355177 | downstream     | A       | G       |

|            |          |            |   |   |
|------------|----------|------------|---|---|
| rs4500467  | 15357720 | downstream | T | C |
| rs12364769 | 15357829 | downstream | C | G |
| rs4757314  | 15362212 | downstream | T | C |
| rs4133144  | 15371043 | downstream | G | A |
| rs10741672 | 15372097 | downstream | T | G |
| rs12278251 | 15373266 | downstream | C | A |
| rs7350480  | 15387984 | downstream | A | G |
| rs10832437 | 15389801 | downstream | T | C |
| rs10766251 | 15400257 | downstream | A | G |
| rs4237709  | 15408823 | downstream | G | A |
| rs4756808  | 15412353 | downstream | T | G |
| rs7126053  | 15412541 | downstream | G | T |
| rs12789212 | 15413318 | downstream | G | A |
| rs7949682  | 15427624 | downstream | C | T |
| rs11023577 | 15427773 | downstream | C | T |
| rs7479920  | 15430164 | downstream | C | T |
| rs12805912 | 15449408 | downstream | G | C |
| rs7939403  | 15450215 | downstream | A | G |
| rs7939628  | 15450400 | downstream | A | C |
| rs7938802  | 15459784 | downstream | A | G |
| rs7480915  | 15461604 | downstream | T | A |
| rs7949952  | 15462690 | downstream | G | A |
| rs7950188  | 15462927 | downstream | G | T |
| rs7117412  | 15468052 | downstream | A | G |
| rs10766261 | 15471465 | downstream | C | T |
| rs10832451 | 15475282 | downstream | T | A |
| rs10832453 | 15475830 | downstream | T | C |
| rs10832454 | 15475924 | downstream | C | A |
| rs7106594  | 15477573 | downstream | A | G |
| rs6486251  | 15478129 | downstream | A | C |
| rs12290607 | 15480220 | downstream | C | T |
| rs7120823  | 15481834 | downstream | A | C |
| rs12270000 | 15485462 | downstream | T | G |
| rs11023603 | 15485606 | downstream | A | G |
| rs10832464 | 15493152 | downstream | G | A |
| rs11023624 | 15512207 | downstream | G | A |
| rs4338491  | 15515720 | downstream | G | A |
| rs2351097  | 15516762 | downstream | T | G |
| rs11023631 | 15531636 | downstream | C | G |
| rs2882570  | 15534878 | downstream | A | G |
| rs2351044  | 15535033 | downstream | A | G |
| rs11023635 | 15536378 | downstream | A | G |
| rs2351046  | 15536923 | downstream | A | G |
| rs2351049  | 15540637 | downstream | A | T |

|            |          |            |   |   |
|------------|----------|------------|---|---|
| rs2351050  | 15540787 | downstream | C | T |
| rs4757337  | 15542792 | downstream | G | A |
| rs2351058  | 15557616 | downstream | G | T |
| rs1880393  | 15562994 | downstream | A | G |
| rs7117096  | 15566164 | downstream | C | T |
| rs7103393  | 15566329 | downstream | T | C |
| rs11023648 | 15568644 | downstream | A | C |
| rs729417   | 15571966 | downstream | A | G |
| rs16931632 | 15576519 | downstream | G | A |
| rs12788084 | 15576654 | downstream | G | A |
| rs17439299 | 15577162 | downstream | G | A |
| rs1552304  | 15578616 | downstream | T | C |
| rs10458875 | 15582363 | downstream | T | A |
| rs10160745 | 15582765 | downstream | T | C |
| rs7927948  | 15588052 | downstream | A | G |
| rs1124115  | 15597394 | downstream | T | G |
| rs1573997  | 15597470 | downstream | T | C |
| rs4756817  | 15604603 | downstream | C | T |
| rs7107683  | 15606190 | downstream | T | C |
| rs11023662 | 15609673 | downstream | T | G |
| rs12578054 | 15613167 | downstream | T | C |
| rs11023667 | 15613567 | downstream | G | A |
| rs10832492 | 15613584 | downstream | A | G |
| rs4756818  | 15614769 | downstream | T | C |
| rs4757346  | 15615852 | downstream | G | A |
| rs4757347  | 15616260 | downstream | G | T |
| rs10832497 | 15621487 | downstream | A | G |
| rs1531903  | 15625402 | downstream | C | G |
| rs7943358  | 15642146 | downstream | G | A |
| rs2068011  | 15642254 | downstream | C | G |
| rs7117858  | 15651038 | downstream | C | T |
| rs12226164 | 15666021 | downstream | T | C |
| rs11023685 | 15666560 | downstream | G | A |
| rs7108738  | 15666660 | downstream | C | A |
| rs11602521 | 15673863 | downstream | A | G |
| rs11023689 | 15676753 | downstream | T | A |
| rs7942222  | 15681974 | downstream | A | G |
| rs1466553  | 15682784 | downstream | G | C |
| rs1471759  | 15685991 | downstream | G | A |
| rs16931831 | 15686130 | downstream | T | C |
| rs900865   | 15686419 | downstream | G | C |
| rs1994214  | 15686932 | downstream | C | A |
| rs11827785 | 15687087 | downstream | C | A |
| rs4426098  | 15687328 | downstream | T | A |

|            |          |            |   |   |
|------------|----------|------------|---|---|
| rs3886607  | 15692229 | downstream | C | T |
| rs12806901 | 15692447 | downstream | C | T |
| rs2054733  | 15693931 | downstream | T | C |
| rs7130751  | 15694322 | downstream | A | G |
| rs2141673  | 15695351 | downstream | G | A |
| rs1011896  | 15702968 | downstream | C | G |
| rs1011824  | 15703573 | downstream | A | G |
| rs9666336  | 15705244 | downstream | A | G |
| rs16931894 | 15705348 | downstream | A | G |
| rs7943117  | 15705830 | downstream | A | T |
| rs10832508 | 15708269 | downstream | T | C |
| rs7107341  | 15708929 | downstream | T | A |
| rs1484444  | 15709379 | downstream | C | T |
| rs7113901  | 15715325 | downstream | C | G |
| rs11023698 | 15716701 | downstream | T | C |
| rs11023700 | 15717617 | downstream | C | T |
| rs11023702 | 15720845 | downstream | T | C |
| rs11023705 | 15723102 | downstream | C | G |
| rs10832515 | 15725228 | downstream | A | G |
| rs7128920  | 15728891 | downstream | T | C |
| rs1484436  | 15730241 | downstream | T | G |
| rs11023707 | 15731689 | downstream | C | T |
| rs7111494  | 15731934 | downstream | C | G |
| rs12293302 | 15733020 | downstream | T | A |
| rs1882133  | 15733362 | downstream | T | C |
| rs931280   | 15733716 | downstream | C | G |
| rs4757360  | 15742412 | downstream | T | C |
| rs16931985 | 15747400 | downstream | A | T |
| rs4265560  | 15747479 | downstream | C | T |
| rs936738   | 15748102 | downstream | G | C |
| rs1110793  | 15748131 | downstream | G | C |
| rs1075749  | 15748420 | downstream | T | C |
| rs1545896  | 15758514 | downstream | T | G |
| rs12798618 | 15770573 | downstream | C | T |
| rs923031   | 15777602 | downstream | G | T |
| rs16932092 | 15778329 | downstream | A | G |
| rs326689   | 15779167 | downstream | T | G |
| rs326686   | 15780714 | downstream | A | G |
| rs11023727 | 15785619 | downstream | C | A |
| rs1440716  | 15786427 | downstream | C | T |
| rs1837607  | 15787071 | downstream | C | T |
| rs2593586  | 15787514 | downstream | C | T |
| rs11023728 | 15789390 | downstream | A | G |
| rs2593590  | 15797902 | downstream | G | A |

|            |          |            |   |   |
|------------|----------|------------|---|---|
| rs1882130  | 15800950 | downstream | T | A |
| rs767781   | 15801852 | downstream | T | C |
| rs1920668  | 15803112 | downstream | C | G |
| rs1440708  | 15805423 | downstream | T | C |
| rs12800617 | 15807131 | downstream | A | T |
| rs1543832  | 15809260 | downstream | A | C |
| rs7112764  | 15814779 | downstream | T | C |
| rs1920672  | 15814869 | downstream | A | C |
| rs12272146 | 15815380 | downstream | T | C |
| rs11023733 | 15815909 | downstream | A | G |
| rs11023737 | 15821863 | downstream | T | A |
| rs12280342 | 15831715 | downstream | A | T |
| rs11023747 | 15836453 | downstream | A | G |
| rs2002372  | 15838186 | downstream | A | C |
| rs874189   | 15838275 | downstream | C | T |
| rs894007   | 15838464 | downstream | G | T |
| rs10832527 | 15840495 | downstream | G | C |
| rs1440707  | 15849862 | downstream | C | T |
| rs4756836  | 15852000 | downstream | C | G |
| rs2196961  | 15856400 | downstream | G | A |
| rs11023757 | 15858795 | downstream | G | A |
| rs12290232 | 15860242 | downstream | A | G |
| rs12287547 | 15863864 | downstream | T | C |
| rs12289250 | 15864697 | downstream | T | C |
| rs1440704  | 15867379 | downstream | C | T |
| rs12270765 | 15869245 | downstream | T | C |
| rs2615027  | 15870567 | downstream | G | A |
| rs2582307  | 15875438 | downstream | A | G |
| rs11023769 | 15877930 | downstream | C | T |
| rs11023771 | 15878737 | downstream | G | A |
| rs11023772 | 15878878 | downstream | C | T |
| rs10832529 | 15887048 | downstream | C | T |
| rs11023775 | 15888323 | downstream | T | C |
| rs2582299  | 15888978 | downstream | G | A |
| rs11023776 | 15889276 | downstream | T | A |
| rs2615040  | 15889353 | downstream | T | C |
| rs10458876 | 15895656 | downstream | A | G |
| rs878625   | 15896271 | downstream | A | G |
| rs2582297  | 15896477 | downstream | A | G |
| rs11023787 | 15908870 | downstream | A | G |
| rs2615016  | 15909119 | downstream | G | C |
| rs894008   | 15917011 | downstream | T | G |
| rs1866822  | 15918927 | downstream | A | C |
| rs7111730  | 15922928 | downstream | A | T |

|            |          |            |   |   |
|------------|----------|------------|---|---|
| rs1470145  | 15933913 | downstream | T | C |
| rs1371917  | 15938033 | downstream | G | A |
| rs7950566  | 15942333 | downstream | C | G |
| rs1065024  | 15945926 | 3UTR       | C | T |
| rs10832539 | 15961138 | intron 15  | G | T |
| rs10832542 | 15963049 | intron 15  | G | A |
| rs10766291 | 15968305 | intron 13  | T | C |
| rs16932405 | 15968818 | intron 13  | C | T |
| rs16932409 | 15970052 | intron 13  | A | G |
| rs10766293 | 15972342 | intron 13  | C | T |
| rs11023821 | 15979442 | intron 13  | T | C |
| rs16932416 | 15979900 | intron 13  | G | A |
| rs12574862 | 15982750 | intron 13  | C | G |
| rs12574859 | 15982867 | intron 13  | A | C |
| rs7942659  | 15983239 | intron 13  | G | A |
| rs7924380  | 15983392 | intron 13  | T | G |
| rs7942880  | 15983418 | intron 13  | T | C |
| rs4478958  | 15985251 | intron 13  | A | G |
| rs10500821 | 15985670 | intron 13  | G | C |
| rs16932455 | 15996751 | intron 12  | A | T |
| rs16932458 | 15997049 | intron 12  | T | G |
| rs9645647  | 15997732 | intron 12  | T | A |
| rs7941496  | 15997881 | intron 12  | T | G |
| rs9645648  | 15998134 | intron 12  | G | A |
| rs10500822 | 16004493 | intron 12  | T | C |
| rs4279976  | 16016409 | intron 12  | A | G |
| rs16932585 | 16105375 | intron 6   | C | T |
| rs9651573  | 16114996 | intron 6   | G | A |
| rs4620684  | 16135202 | intron 6   | G | C |
| rs12576286 | 16148674 | intron 6   | A | T |
| rs10832554 | 16148859 | intron 6   | A | G |
| rs16932670 | 16152464 | intron 6   | C | A |
| rs11023860 | 16152517 | intron 6   | G | T |
| rs16924862 | 16152913 | intron 6   | G | A |
| rs7118395  | 16155641 | intron 6   | C | T |
| rs7108091  | 16155907 | intron 6   | C | T |
| rs7125634  | 16182317 | intron 4   | T | C |
| rs12420519 | 16189798 | intron 4   | T | G |
| rs10832565 | 16198630 | intron 4   | A | G |
| rs10832566 | 16198924 | intron 4   | C | G |
| rs10832567 | 16199151 | intron 4   | G | A |
| rs2028162  | 16204051 | intron 4   | G | A |
| rs1837096  | 16219450 | intron 3   | G | A |
| rs12798980 | 16234929 | intron 3   | C | G |

|            |          |          |   |   |
|------------|----------|----------|---|---|
| rs10832576 | 16236880 | intron 3 | A | T |
| rs12274377 | 16247709 | intron 3 | A | T |
| rs1347677  | 16252988 | intron 3 | G | T |
| rs12225830 | 16276290 | intron 3 | G | A |
| rs11023907 | 16281025 | intron 3 | T | G |
| rs10219384 | 16285545 | intron 3 | T | C |
| rs297367   | 16285585 | intron 3 | A | G |
| rs297366   | 16286125 | intron 3 | C | T |
| rs297361   | 16294951 | intron 3 | A | G |
| rs297360   | 16299657 | intron 2 | G | T |
| rs297324   | 16345860 | intron 1 | G | A |
| rs297325   | 16346170 | intron 1 | C | T |
| rs297326   | 16346308 | intron 1 | T | G |
| rs297339   | 16360859 | intron 1 | A | G |
| rs1847314  | 16365112 | intron 1 | T | C |
| rs1847315  | 16365152 | intron 1 | T | C |
| rs1018143  | 16372480 | intron 1 | C | T |
| rs1393926  | 16375287 | intron 1 | T | C |
| rs7946119  | 16378434 | intron 1 | C | T |
| rs11023934 | 16382534 | intron 1 | A | T |
| rs12221729 | 16389040 | intron 1 | A | C |
| rs1503449  | 16391269 | intron 1 | G | T |
| rs11820804 | 16392640 | intron 1 | C | T |
| rs7945099  | 16394550 | intron 1 | A | G |
| rs7932807  | 16394987 | intron 1 | G | A |
| rs16933090 | 16412370 | intron 1 | T | C |
| rs10832606 | 16416136 | intron 1 | C | T |
| rs11023944 | 16417484 | intron 1 | C | A |
| rs10832607 | 16419343 | intron 1 | T | C |
| rs16933105 | 16421254 | intron 1 | T | A |
| rs11023945 | 16421615 | intron 1 | T | C |
| rs10832608 | 16431123 | intron 1 | G | A |
| rs12805370 | 16431338 | intron 1 | A | T |
| rs10500830 | 16441827 | intron 1 | A | G |
| rs1354329  | 16441877 | intron 1 | T | C |
| rs7118874  | 16443641 | intron 1 | G | A |
| rs7950287  | 16448694 | intron 1 | T | G |
| rs10832613 | 16449603 | intron 1 | T | C |
| rs10832614 | 16449792 | intron 1 | T | C |

---
